# Supplementary material for: Mesoporous silica nanoparticle-based cisplatin prodrug delivery and anticancer effect under reductive cellular environment
Source: Royal Society of Chemistry journal article supplement (doi:10.1039/c3tb20319k), 2013-01-01
Supplement: c3tb20319k.pdf [file c3tb20319k.pdf]

## Supporting Information

### Mesoporous silica nanoparticles based cisplatin prodrug delivery and anticancer effect under reductive cellular environment

Byungjun Ahn, Juhee Park, Kaushik Singha, Hansoo Park, Won Jong Kim

#### 1. Fluorescamine assay

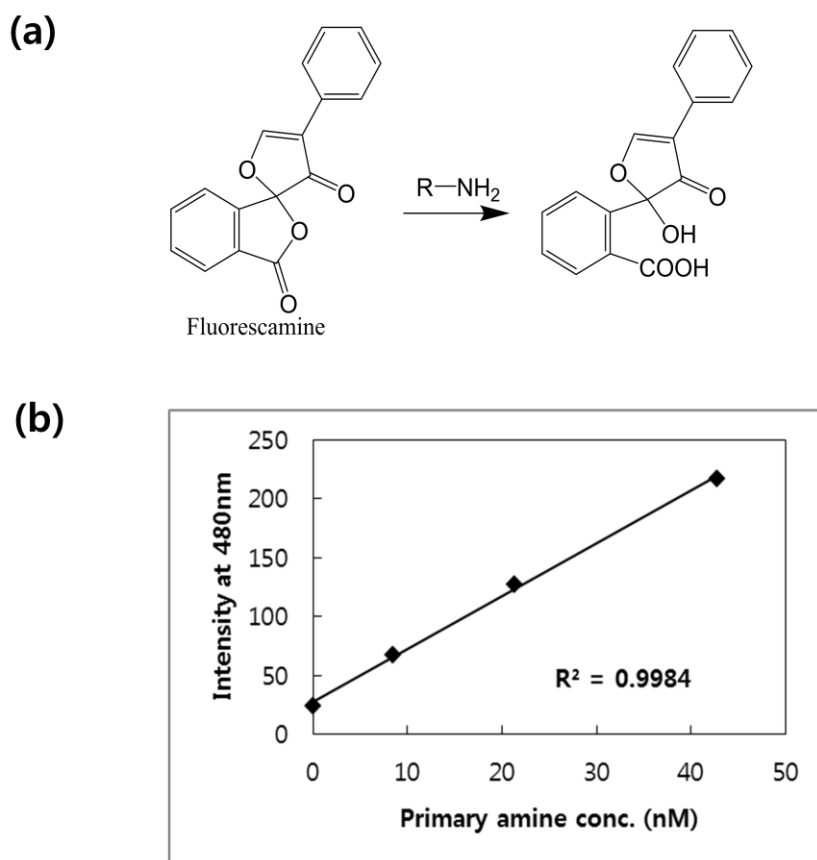

**Figure S1.** Fluorescamine assay. (a) Mechanism of fluorescamine reaction with primary amine, (b) Standard curve with APTES..

## 2. BET and BJH analysis

(a)

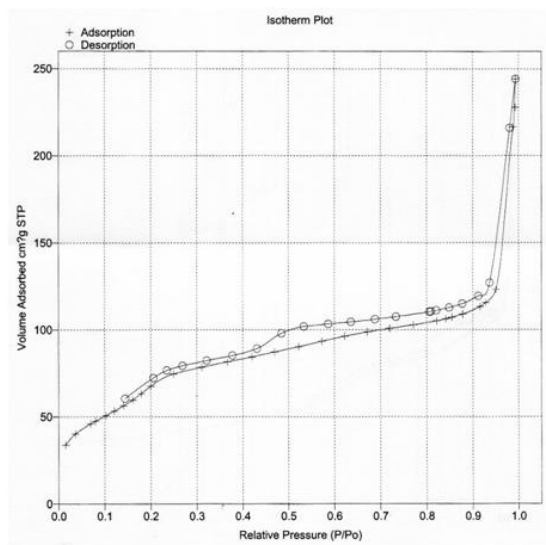

(b)

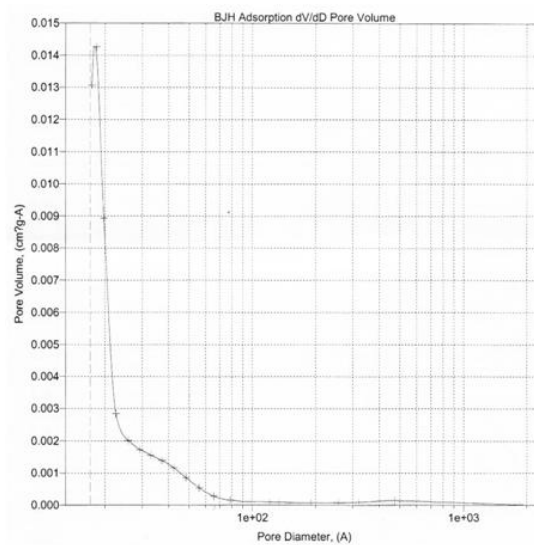

**Figure S2.** Surface area (a) and pore volume and diameter (b) plots

### 3. Zeta potential measurement of prodrug-MSN carrier (10% prodrug loading)

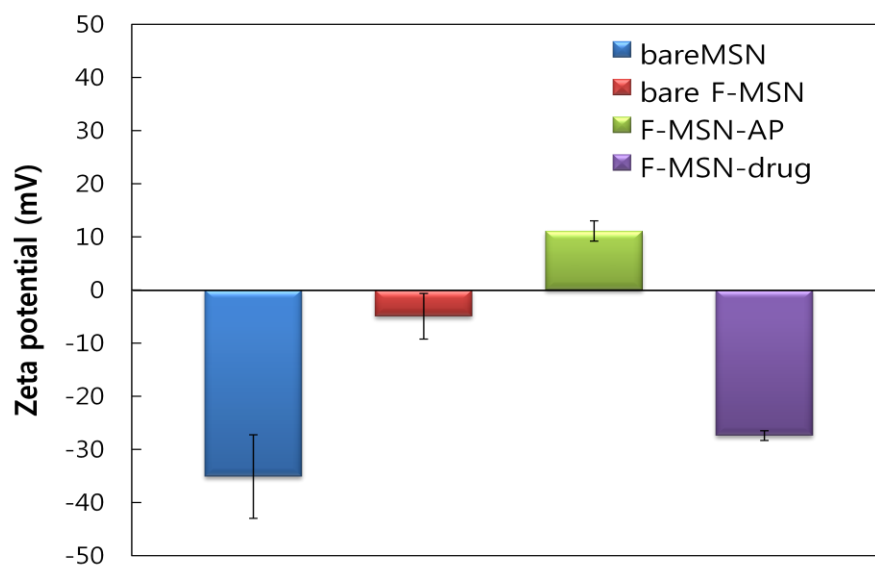

**Figure S3.** Zeta potential values of bare MSN, F-MSN, F-MSN-AP and F-MSN-drug. Bare MSN was prepared without FITC-APTES. F-MSN-drug (weight of loaded prodrug / weight of F-MSN-prodrug is 10%).

#### 4. Synthesis of Pt-quantification dye

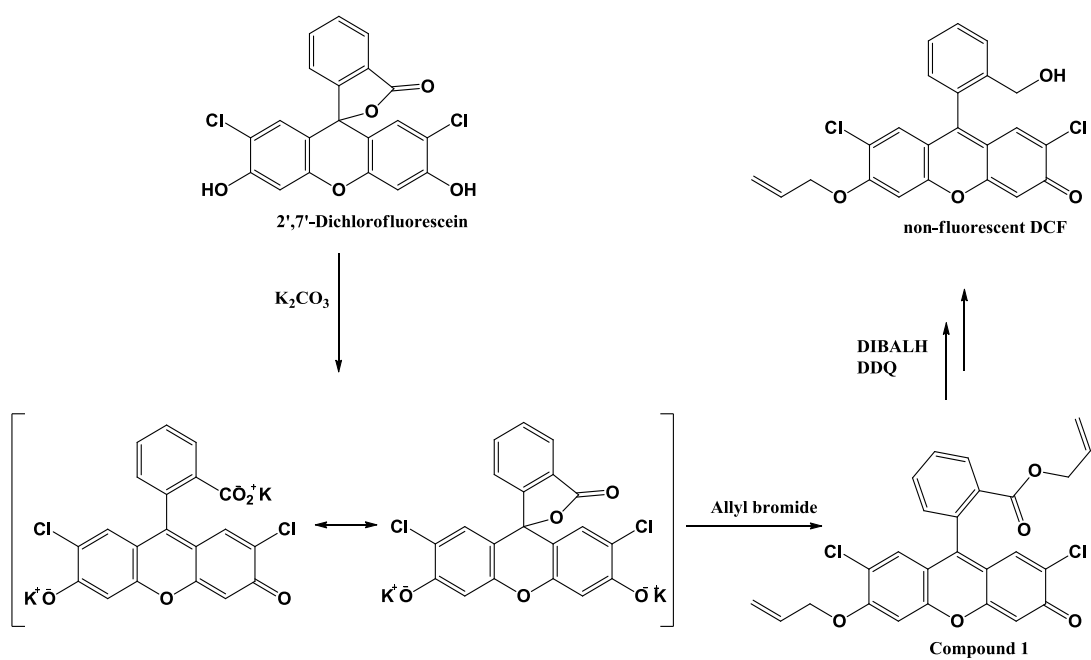

**Figure S4.** Synthetic scheme of non-fluorescent DCF from 2',7'-dichlorofluorescein.

## 5. Cell toxicity of MSN only and F-MSN-drug carrier

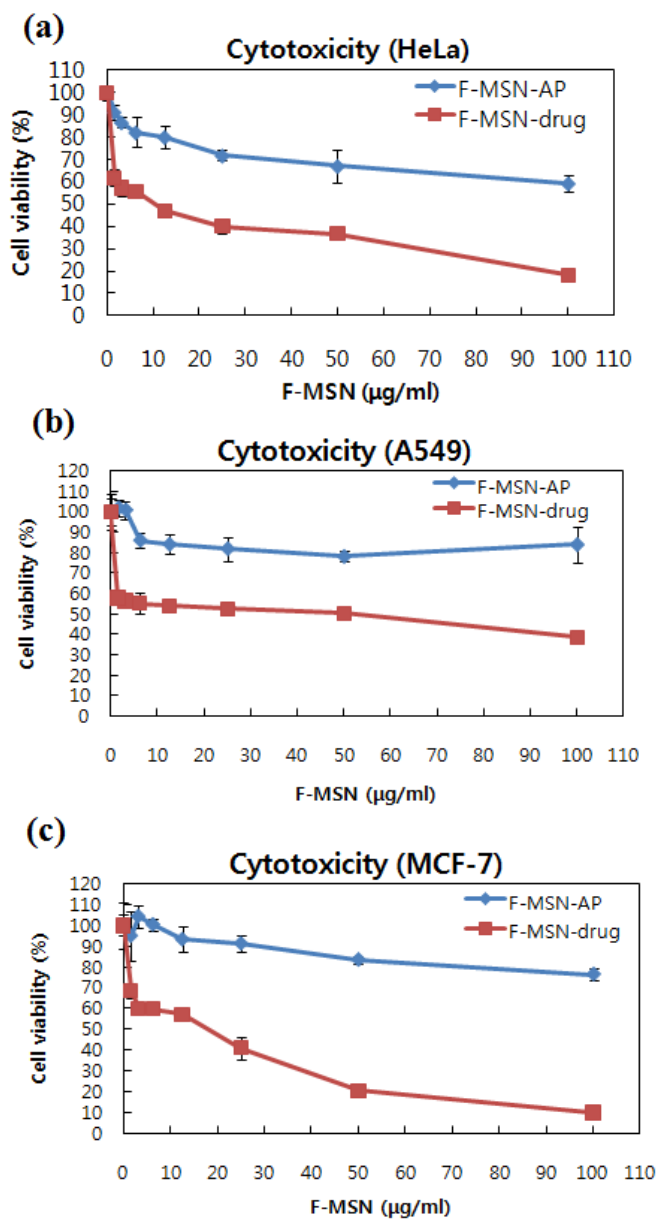

**Figure S5.** Relative cytotoxicity of (a) HeLa, (b) A549, and (c) MCF-7 cell lines treated with various concentrations of F-MSN-AP and F-MSN-drug.
